# Supplementary material
Source: Springer Nature journal article supplement (https://www.springermedizin.de/resource/supplementary/12958_2009_529_MOESM7_ESM.pdf/9568222)

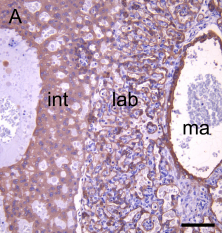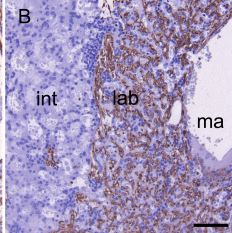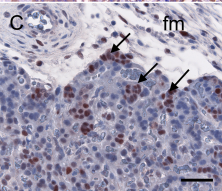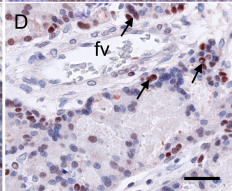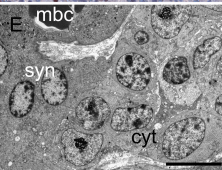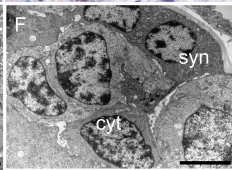

Supplement: MOESM7 [file 9568222]
